# Supplementary material for: The Dynamics of Antimicrobial Resistance among Enterobacteriaceae Isolates in Russia: Results of the 2012–2018 INFORM and ATLAS International Program Studies
Source: MDPI journal article supplement (doi:10.3390/antibiotics11060790), 2022-06-10
Supplement: s1 [file s1]

## Supplementary Materials

**Table S1.** Distribution of Enterobacterales based upon source of infection (an alternative variant of Table 3).

| Species                      | Total          | Intra-<br>Abdominal<br>Infections | Genitourinary<br>Tract Infections | Skin and soft<br>tissue<br>Infections | Lower<br>Respiratory<br>Tract<br>Infections |
|------------------------------|----------------|-----------------------------------|-----------------------------------|---------------------------------------|---------------------------------------------|
| <b>All isolates</b>          | <b>N=3,811</b> | <b>N=614</b>                      | <b>N=1,069</b>                    | <b>N=894</b>                          | <b>N=1,234</b>                              |
| <i>Klebsiella</i> spp.       | 1464 [100%]    | 186 [12.7%]                       | 287 [19.6%]                       | 274 [18.7%]                           | 717 [49%]                                   |
| <i>Escherichia coli</i>      | 1314 [100%]    | 265 [20.2%]                       | 502 [38.2%]                       | 329 [25%]                             | 218 [16.6%]                                 |
| <i>Enterobacter</i><br>spp.  | 335 [100%]     | 60 [17.9%]                        | 74 [22.1%]                        | 102 [30.4%]                           | 99 [29.6%]                                  |
| <i>Proteus</i> spp.          | 324 [100%]     | 33 [10.2%]                        | 116 [35.8%]                       | 94 [29%]                              | 81 [25%]                                    |
| <i>Citrobacter</i> spp.      | 142 [100%]     | 34 [23.9%]                        | 33 [23.2%]                        | 43 [30.3%]                            | 32 [22.5%]                                  |
| <i>Serratia</i> spp.         | 108 [100%]     | 11 [10.2%]                        | 17 [15.7%]                        | 21 [19.4%]                            | 59 [54.6%]                                  |
| <i>Morganella</i> spp.       | 85 [100%]      | 16 [18.8%]                        | 31 [36.5%]                        | 19 [22.4%]                            | 19 [22.4%]                                  |
| <i>Providencia</i> spp.      | 25 [100%]      | 7 [28%]                           | 8 [32%]                           | 9 [36%]                               | 1 [4%]                                      |
| <i>Raoultella</i> spp.       | 10 [100%]      | 1 [10%]                           | 1 [10%]                           | 2 [20%]                               | 6 [60%]                                     |
| <i>Hafnia</i> spp.           | 3 [100%]       | 1 [33.3%]                         | 0 [0%]                            | 0 [0%]                                | 2 [66.7%]                                   |
| <i>Pluralibacter</i><br>spp. | 1 [100%]       | 0 [0%]                            | 0 [0%]                            | 1 [100%]                              | 0 [0%]                                      |

**Table S2.** MIC<sub>50</sub> (mg/L) values for *Enterobacterales*.

| Antimicrobial           | Over all time | 2012 | 2013 | 2014 | 2015 | 2016 | 2017 | 2018 |
|-------------------------|---------------|------|------|------|------|------|------|------|
| Amikacin                | 2             | 4    | 4    | 4    | 2    | 2    | 2    | 2    |
| Gentamicin              | 0.5           | -    | -    | -    | -    | -    | -    | 0.5  |
| Doripenem               | 0.06          | 0.12 | 0.06 | 0.06 | 0.06 | 0.06 | 0.03 | -    |
| Ertapenem               | 0.06          | 0.06 | 0.06 | -    | -    | -    | -    | -    |
| Imipenem                | 0.25          | 0.25 | 0.25 | 0.25 | 0.25 | 0.25 | 0.25 | 0.5  |
| Meropenem               | 0.06          | 0.06 | 0.03 | 0.06 | 0.06 | 0.06 | 0.03 | 0.06 |
| Cefepime                | 1             | 8    | 4    | 4    | 0.12 | 0.12 | 0.5  | 2    |
| Cefoperazone/sulbactam  | 4             | -    | -    | -    | -    | -    | -    | 4    |
| Ceftaroline             | 16            | 32   | 128  | 256  | 0.25 | 0.5  | 16   | 16   |
| Ceftaroline/avibactam   | 0.06          | 0.12 | 0.06 | 0.06 | -    | -    | -    | -    |
| Ceftazidime             | 1             | 8    | 2    | 2    | 0.25 | 0.5  | 0.5  | 4    |
| Ceftazidime/avibactam   | 0.12          | 0.25 | 0.12 | 0.12 | 0.12 | 0.12 | 0.12 | 0.25 |
| Ceftolozane/tazobactam  | 0.25          | -    | -    | -    | -    | -    | 0.25 | -    |
| Ceftriaxone             | 0.5           | -    | -    | -    | -    | 0.25 | 12   | -    |
| Trimethoprim sulfa      | 2             | -    | -    | -    | -    | -    | -    | 2    |
| Tigecycline             | 0.5           | 0.5  | 0.5  | 0.5  | 0.25 | 0.25 | 0.25 | 0.5  |
| Colistin                | 0.5           | -    | -    | 1    | 0.5  | 0.25 | 0.5  | 0.5  |
| Aztreonam               | 1             | 8    | 4    | 8    | 0.12 | 0.25 | 1    | 6    |
| Aztreonam avibactam     | 0.06          | 0.06 | 0.06 | 0.06 | 0.06 | 0.06 | 0.03 | 0.06 |
| Ampicillin/sulbactam    | 32            | -    | -    | -    | -    | -    | -    | 32   |
| Amoxicillin/clavulanate | 16            | 16   | 16   | 16   | 16   | 16   | 16   | 32   |
| Ampicillin              | 64            | 64   | 64   | 64   | 64   | 64   | 64   | 32   |
| Piperacillin/tazobactam | 4             | 4    | 4    | 4    | 2    | 4    | 2    | 4    |
| Ciprofloxacin           | 1             | -    | -    | -    | -    | -    | -    | 1    |
| Levofloxacin            | 0.5           | 2    | 0.5  | 1    | 0.06 | 0.25 | 0.25 | 1    |

**Table S3.** MIC<sub>90</sub> (mg/L) dynamics for *Enterobacterales*

| Antimicrobial           | Over all time | 2012 | 2013 | 2014 | 2015 | 2016 | 2017 | 2018 |
|-------------------------|---------------|------|------|------|------|------|------|------|
| Amikacin                | 64            | 64   | 16   | 16   | 16   | 8    | 16   | 128  |
| Gentamicin              | 32            | -    | -    | -    | -    | -    | -    | 32   |
| Doripenem               | 0.5           | 1    | 0.25 | 0.25 | 0.25 | 0.25 | 0.5  | -    |
| Ertapenem               | 1             | 1    | 1    | -    | -    | -    | -    | -    |
| Imipenem                | 4             | 4    | 2    | 2    | 4    | 2    | 2    | 16   |
| Meropenem               | 0.25          | 0.25 | 0.12 | 0.25 | 0.12 | 0.12 | 0.25 | 32   |
| Cefepime                | 32            | 32   | 32   | 32   | 32   | 32   | 32   | 64   |
| Cefoperazone/sulbactam  | 128           | -    | -    | -    | -    | -    | -    | 128  |
| Ceftaroline             | 256           | 256  | 256  | 256  | 256  | 256  | 256  | 16   |
| Ceftaroline/avibactam   | 0.25          | 0.5  | 0.25 | 0.25 | -    | -    | -    | -    |
| Ceftazidime             | 256           | 256  | 128  | 128  | 128  | 128  | 256  | 256  |
| Ceftazidime/avibactam   | 1             | 1    | 0.5  | 0.5  | 0.5  | 0.5  | 0.5  | 2    |
| Ceftolozane/tazobactam  | 64            | -    | -    | -    | -    | -    | 64   | -    |
| Ceftriaxone             | 32            | -    | -    | -    | -    | 32   | 32   | -    |
| Co-trimoxazole          | 64            | -    | -    | -    | -    | -    | -    | 64   |
| Tigecycline             | 2             | 4    | 2    | 2    | 1    | 1    | 1    | 2    |
| Colistin                | 8             | -    | -    | 8    | 16   | 16   | 16   | 16   |
| Aztreonam               | 256           | 256  | 256  | 128  | 128  | 128  | 256  | 128  |
| Aztreonam/avibactam     | 0.25          | 0.5  | 0.25 | 0.12 | 0.12 | 0.12 | 0.12 | 0.25 |
| Ampicillin/sulbactam    | 128           | -    | -    | -    | -    | -    | -    | 128  |
| Amoxicillin/clavulanate | 32            | 32   | 32   | 32   | 64   | 64   | 64   | 32   |
| Ampicillin              | 64            | 64   | 64   | 64   | 64   | 64   | 64   | 32   |

|                                |     |     |     |     |     |     |     |     |
|--------------------------------|-----|-----|-----|-----|-----|-----|-----|-----|
| <b>Piperacillin/tazobactam</b> | 256 | 256 | 256 | 128 | 256 | 256 | 256 | 128 |
| <b>Ciprofloxacin</b>           | 8   | -   | -   | -   | -   | -   | -   | 8   |
| <b>Levofloxacin</b>            | 16  | 8   | 8   | 8   | 16  | 16  | 16  | 16  |

**Table S4.** The MDR rates depending on source of infection.

| According to the criteria proposed by Hackel 2016      |                     |                   |                   |                   |                    |
|--------------------------------------------------------|---------------------|-------------------|-------------------|-------------------|--------------------|
| Year                                                   | Total               | IAIs              | UTIs              | SSTIs             | LRTIs              |
| <b>All Enterobacteriales</b>                           |                     |                   |                   |                   |                    |
| 2012                                                   | 203 / 394 (51.5%)   | 8 / 17 (47.1%)    | 62 / 167 (37.1%)  | 52 / 98 (53.1%)   | 81 / 112 (72.3%)   |
| 2013                                                   | 310 / 712 (43.5%)   | 33 / 84 (39.3%)   | 81 / 198 (40.9%)  | 79 / 198 (39.9%)  | 117 / 232 (50.4%)  |
| 2014                                                   | 343 / 812 (42.2%)   | 43 / 154 (27.9%)  | 105 / 262 (40.1%) | 55 / 137 (40.1%)  | 140 / 259 (54.1%)  |
| 2015                                                   | 112 / 383 (29.2%)   | 3 / 17 (17.6%)    | 33 / 133 (24.8%)  | 30 / 105 (28.6%)  | 46 / 128 (35.9%)   |
| 2016                                                   | 160 / 478 (33.5%)   | 13 / 89 (14.6%)   | 30 / 100 (30%)    | 55 / 131 (42%)    | 62 / 158 (39.2%)   |
| 2017                                                   | 186 / 470 (39.6%)   | 25 / 91 (27.5%)   | 23 / 83 (27.7%)   | 52 / 123 (42.3%)  | 86 / 173 (49.7%)   |
| 2018                                                   | 269 / 562 (47.9%)   | 43 / 162 (26.5%)  | 62 / 126 (49.2%)  | 49 / 102 (48%)    | 115 / 172 (66.9%)  |
| Total                                                  | 1583 / 3811 (41.5%) | 168 / 614 (27.4%) | 396 / 1069 (37%)  | 372 / 894 (41.6%) | 647 / 1234 (52.4%) |
| <b><i>E. coli</i></b>                                  |                     |                   |                   |                   |                    |
| 2012                                                   | 44 / 123 (35.8%)    | 3 / 7 (42.9%)     | 19 / 72 (26.4%)   | 10 / 23 (43.5%)   | 12 / 21 (57.1%)    |
| 2013                                                   | 80 / 253 (31.6%)    | 17 / 47 (36.2%)   | 25 / 102 (24.5%)  | 27 / 69 (39.1%)   | 11 / 35 (31.4%)    |
| 2014                                                   | 75 / 304 (24.7%)    | 17 / 79 (21.5%)   | 36 / 136 (26.5%)  | 15 / 50 (30%)     | 7 / 39 (17.9%)     |
| 2015                                                   | 31 / 145 (21.4%)    | 2 / 8 (25%)       | 16 / 68 (23.5%)   | 8 / 43 (18.6%)    | 5 / 26 (19.2%)     |
| 2016                                                   | 40 / 165 (24.2%)    | 2 / 29 (6.9%)     | 10 / 45 (22.2%)   | 20 / 55 (36.4%)   | 8 / 36 (22.2%)     |
| 2017                                                   | 43 / 161 (26.7%)    | 7 / 33 (21.2%)    | 6 / 33 (18.2%)    | 18 / 55 (32.7%)   | 12 / 40 (30%)      |
| 2018                                                   | 57 / 163 (35%)      | 24 / 62 (38.7%)   | 13 / 46 (28.3%)   | 11 / 34 (32.4%)   | 9 / 21 (42.9%)     |
| Total                                                  | 370 / 1314 (28.2%)  | 72 / 265 (27.2%)  | 125 / 502 (24.9%) | 109 / 329 (33.1%) | 64 / 218 (29.4%)   |
| <b><i>K. pneumoniae</i></b>                            |                     |                   |                   |                   |                    |
| 2012                                                   | 100 / 129 (77.5%)   | 2 / 3 (66.7%)     | 19 / 33 (57.6%)   | 25 / 33 (75.8%)   | 54 / 60 (90%)      |
| 2013                                                   | 152 / 232 (65.5%)   | 12 / 24 (50%)     | 30 / 42 (71.4%)   | 31 / 47 (66%)     | 79 / 119 (66.4%)   |
| 2014                                                   | 199 / 309 (64.4%)   | 19 / 37 (51.4%)   | 46 / 75 (61.3%)   | 32 / 52 (61.5%)   | 102 / 145 (70.3%)  |
| 2015                                                   | 51 / 108 (47.2%)    | 1 / 3 (33.3%)     | 12 / 32 (37.5%)   | 14 / 23 (60.9%)   | 24 / 50 (48%)      |
| 2016                                                   | 80 / 135 (59.3%)    | 9 / 27 (33.3%)    | 14 / 21 (66.7%)   | 15 / 20 (75%)     | 42 / 67 (62.7%)    |
| 2017                                                   | 104 / 145 (71.7%)   | 13 / 21 (61.9%)   | 9 / 13 (69.2%)    | 24 / 30 (80%)     | 58 / 81 (71.6%)    |
| 2018                                                   | 148 / 188 (78.7%)   | 12 / 29 (41.4%)   | 24 / 29 (82.8%)   | 23 / 24 (95.8%)   | 89 / 106 (84%)     |
| Total                                                  | 834 / 1246 (66.9%)  | 68 / 144 (47.2%)  | 154 / 245 (62.9%) | 164 / 229 (71.6%) | 448 / 628 (71.3%)  |
| According to the criteria proposed by Castanheira 2019 |                     |                   |                   |                   |                    |
| Year                                                   | Total               | IAI               | UTI               | SSTI              | LRTI               |
| <b>All Enterobacteriales</b>                           |                     |                   |                   |                   |                    |
| 2012                                                   | 59 / 394 (15%)      | 1 / 17 (5.9%)     | 18 / 167 (10.8%)  | 18 / 98 (18.4%)   | 22 / 112 (19.6%)   |
| 2013                                                   | 19 / 712 (2.7%)     | 2 / 84 (2.4%)     | 7 / 198 (3.5%)    | 4 / 198 (2%)      | 6 / 232 (2.6%)     |
| 2014                                                   | 66 / 812 (8.1%)     | 3 / 154 (1.9%)    | 26 / 262 (9.9%)   | 11 / 137 (8%)     | 26 / 259 (10%)     |
| 2015                                                   | 23 / 383 (6%)       | 0 / 17 (0%)       | 3 / 133 (2.3%)    | 9 / 105 (8.6%)    | 11 / 128 (8.6%)    |
| 2016                                                   | 28 / 478 (5.9%)     | 8 / 89 (9%)       | 3 / 100 (3%)      | 10 / 131 (7.6%)   | 7 / 158 (4.4%)     |
| 2017                                                   | 33 / 470 (7%)       | 3 / 91 (3.3%)     | 10 / 83 (12%)     | 9 / 123 (7.3%)    | 11 / 173 (6.4%)    |
| 2018                                                   | 111 / 562 (19.8%)   | 8 / 162 (4.9%)    | 31 / 126 (24.6%)  | 18 / 102 (17.6%)  | 54 / 172 (31.4%)   |
| Total                                                  | 339 / 3811 (8.9%)   | 25 / 614 (4.1%)   | 98 / 1069 (9.2%)  | 79 / 894 (8.8%)   | 137 / 1234 (11.1%) |
| <b><i>E. coli</i></b>                                  |                     |                   |                   |                   |                    |
| 2012                                                   | 10 / 123 (8.1%)     | 1 / 7 (14.3%)     | 3 / 72 (4.2%)     | 3 / 23 (13%)      | 1 / 21 (4.8%)      |
| 2013                                                   | 3 / 253 (1.2%)      | 0 / 47 (0%)       | 1 / 102 (1%)      | 2 / 69 (2.9%)     | 0 / 35 (0%)        |
| 2014                                                   | 0 / 304 (0%)        | 0 / 79 (0%)       | 0 / 136 (0%)      | 0 / 50 (0%)       | 0 / 39 (0%)        |
| 2015                                                   | 2 / 145 (1.4%)      | 0 / 8 (0%)        | 0 / 68 (0%)       | 2 / 43 (4.7%)     | 0 / 26 (0%)        |
| 2016                                                   | 1 / 165 (0.6%)      | 0 / 29 (0%)       | 0 / 45 (0%)       | 0 / 55 (0%)       | 0 / 36 (0%)        |
| 2017                                                   | 0 / 161 (0%)        | 0 / 33 (0%)       | 0 / 33 (0%)       | 1 / 55 (1.8%)     | 0 / 40 (0%)        |
| 2018                                                   | 7 / 163 (4.3%)      | 3 / 62 (4.8%)     | 3 / 46 (6.5%)     | 0 / 34 (0%)       | 3 / 21 (14.3%)     |
| Total                                                  | 23 / 1314 (1.8%)    | 4 / 265 (1.5%)    | 7 / 502 (1.4%)    | 8 / 329 (2.4%)    | 4 / 218 (1.8%)     |
| <b><i>K. pneumoniae</i></b>                            |                     |                   |                   |                   |                    |
| 2012                                                   | 22 / 129 (17.1%)    | 0 / 3 (0%)        | 1 / 33 (3%)       | 9 / 33 (27.3%)    | 12 / 60 (20%)      |
| 2013                                                   | 7 / 232 (3%)        | 1 / 24 (4.2%)     | 1 / 42 (2.4%)     | 1 / 47 (2.1%)     | 4 / 119 (3.4%)     |
| 2014                                                   | 25 / 309 (8.1%)     | 1 / 37 (2.7%)     | 9 / 75 (12%)      | 7 / 52 (13.5%)    | 8 / 145 (5.5%)     |
| 2015                                                   | 10 / 108 (9.3%)     | 0 / 3 (0%)        | 1 / 32 (3.1%)     | 4 / 23 (17.4%)    | 5 / 50 (10%)       |
| 2016                                                   | 17 / 135 (12.6%)    | 5 / 27 (18.5%)    | 2 / 21 (9.5%)     | 5 / 20 (25%)      | 5 / 67 (7.5%)      |
| 2017                                                   | 15 / 145 (10.3%)    | 2 / 21 (9.5%)     | 3 / 13 (23.1%)    | 4 / 30 (13.3%)    | 6 / 81 (7.4%)      |

|       |                    |                 |                  |                  |                  |
|-------|--------------------|-----------------|------------------|------------------|------------------|
| 2018  | 80 / 188 (42.6%)   | 3 / 29 (10.3%)  | 17 / 29 (58.6%)  | 12 / 24 (50%)    | 48 / 106 (45.3%) |
| Total | 176 / 1246 (14.1%) | 12 / 144 (8.3%) | 34 / 245 (13.9%) | 42 / 229 (18.3%) | 88 / 628 (14%)   |

**Table S5.** The cumulative number of ESBL-positive (ESBL+) strains among the isolates depending on bacterial species and location of the infection source.

| Species                            | N(%) ESBL+ isolates (% from total) | N(%) ESBL+ isolates (among IAI) | N(%) ESBL+ isolates (among UTI) | N(%) ESBL+ isolates (among SSTI) | N(%) ESBL+ isolates (among LRTI) |
|------------------------------------|------------------------------------|---------------------------------|---------------------------------|----------------------------------|----------------------------------|
| All isolates                       | 1784 / 3811 (46.8%)                | 220 / 614 (35.8%)               | 420 / 1069 (39.3%)              | 406 / 894 (45.4%)                | 738 / 1234 (59.8%)               |
| <i>Escherichia coli</i>            | 529 / 1314 (40.3%)                 | 107 / 265 (40.4%)               | 167 / 502 (33.3%)               | 147 / 329 (44.7%)                | 108 / 218 (49.5%)                |
| <i>Klebsiella pneumoniae</i>       | 935 / 1246 (75%)                   | 85 / 144 (59%)                  | 163 / 245 (66.5%)               | 177 / 229 (77.3%)                | 510 / 628 (81.2%)                |
| <i>Enterobacter cloacae</i>        | 79 / 297 (26.6%)                   | 8 / 48 (16.7%)                  | 20 / 66 (30.3%)                 | 22 / 98 (22.4%)                  | 29 / 85 (34.1%)                  |
| <i>Proteus mirabilis</i>           | 110 / 255 (43.1%)                  | 5 / 24 (20.8%)                  | 37 / 93 (39.8%)                 | 24 / 66 (36.4%)                  | 44 / 72 (61.1%)                  |
| <i>Klebsiella oxytoca</i>          | 20 / 130 (15.4%)                   | 5 / 23 (21.7%)                  | 2 / 25 (8%)                     | 2 / 27 (7.4%)                    | 11 / 55 (20%)                    |
| <i>Citrobacter freundii</i>        | 23 / 100 (23%)                     | 2 / 25 (8%)                     | 6 / 25 (24%)                    | 7 / 27 (25.9%)                   | 8 / 23 (34.8%)                   |
| <i>Serratia marcescens</i>         | 29 / 100 (29%)                     | 3 / 11 (27.3%)                  | 8 / 15 (53.3%)                  | 6 / 21 (28.6%)                   | 12 / 53 (22.6%)                  |
| <i>Morganella morganii</i>         | 15 / 85 (17.6%)                    | 2 / 16 (12.5%)                  | 6 / 31 (19.4%)                  | 5 / 19 (26.3%)                   | 2 / 19 (10.5%)                   |
| <i>Klebsiella aerogenes</i>        | 23 / 76 (30.3%)                    | / 13 (0%)                       | 6 / 17 (35.3%)                  | 6 / 17 (35.3%)                   | 11 / 29 (37.9%)                  |
| <i>Proteus vulgaris</i>            | 2 / 56 (3.6%)                      | 0 / 5 (0%)                      | 1 / 20 (5%)                     | 1 / 22 (4.5%)                    | 0 / 9 (0%)                       |
| <i>Citrobacter braakii</i>         | 8 / 24 (33.3%)                     | 1 / 3 (33.3%)                   | 1 / 2 (50%)                     | 5 / 13 (38.5%)                   | 1 / 0 (0%)                       |
| <i>Enterobacter asburiae</i>       | 1 / 16 (6.3%)                      | 0 / 5 (0%)                      | 1 / 3 (33.3%)                   | 0 / 2 (0%)                       | 0 / 6 (0%)                       |
| <i>Providencia rettgeri</i>        | 2 / 15 (13.3%)                     | 0 / 3 (0%)                      | 0 / 2 (0%)                      | 2 / 9 (22.2%)                    | 0 / 1 (0%)                       |
| <i>Klebsiella variicola</i>        | 0 / 12 (0%)                        | 0 / 6 (0%)                      | 0 / 0 (0%)                      | 0 / 1 (0%)                       | 0 / 5 (0%)                       |
| <i>Enterobacter, non-specified</i> | 0 / 11 (0%)                        | 0 / 0 (0%)                      | 0 / 5 (0%)                      | 0 / 0 (0%)                       | 0 / 6 (0%)                       |
| <i>Proteus hauseri</i>             | 0 / 10 (0%)                        | 0 / 2 (0%)                      | 0 / 3 (0%)                      | 0 / 5 (0%)                       | 0 / 0 (0%)                       |
| <i>Citrobacter koseri</i>          | 0 / 9 (0%)                         | 0 / 0 (0%)                      | 0 / 3 (0%)                      | 0 / 3 (0%)                       | 0 / 3 (0%)                       |
| <i>Raoultella ornithinolytica</i>  | 0 / 9 (0%)                         | 0 / 1 (0%)                      | 0 / 1 (0%)                      | 0 / 2 (0%)                       | 0 / 6 (0%)                       |
| <i>Enterobacter kobei</i>          | 3 / 6 (50%)                        | 0 / 3 (0%)                      | 0 / 0 (0%)                      | 2 / 2 (100%)                     | 1 / 1 (100%)                     |
| <i>Serratia liquefaciens</i>       | 0 / 6 (0%)                         | 0 / 0 (0%)                      | 0 / 1 (0%)                      | 0 / 0 (0%)                       | 0 / 5 (0%)                       |
| <i>Citrobacter farmeri</i>         | 0 / 5 (0%)                         | 0 / 5 (0%)                      | 0 / 0 (0%)                      | 0 / 0 (0%)                       | 0 / 0 (0%)                       |
| <i>Enterobacter ludwigii</i>       | 0 / 5 (0%)                         | 0 / 4 (0%)                      | 0 / 0 (0%)                      | 0 / 0 (0%)                       | 0 / 1 (0%)                       |
| <i>Providencia alcalifaciens</i>   | 0 / 5 (0%)                         | 0 / 3 (0%)                      | 0 / 2 (0%)                      | 0 / 0 (0%)                       | 0 / 0 (0%)                       |
| <i>Providencia stuartii</i>        | 2 / 5 (40%)                        | 1 / 1 (100%)                    | 1 / 4 (25%)                     | 0 / 0 (0%)                       | 0 / 0 (0%)                       |
| <i>Citrobacter amalonaticus</i>    | 0 / 4 (0%)                         | 0 / 1 (0%)                      | 0 / 3 (0%)                      | 0 / 0 (0%)                       | 0 / 6 (0%)                       |
| <i>Hafnia alvei</i>                | 2 / 3 (66.7%)                      | 1 / 1 (100%)                    | 0 / 0 (0%)                      | 0 / 0 (0%)                       | 1 / 2 (50%)                      |
| <i>Proteus penneri</i>             | 0 / 3 (0%)                         | 0 / 2 (0%)                      | 0 / 0 (0%)                      | 0 / 1 (0%)                       | 0 / 0 (0%)                       |
| <i>Pluralibacter gergoviae</i>     | 0 / 1 (0%)                         | 0 / 0 (0%)                      | 0 / 0 (0%)                      | 0 / 1 (0%)                       | 0 / 0 (0%)                       |
| <i>Raoultella planticola</i>       | 0 / 1 (0%)                         | 0 / 0 (0%)                      | 0 / 0 (0%)                      | 0 / 0 (0%)                       | 0 / 0 (0%)                       |
| <i>Serratia odorifera</i>          | 0 / 1 (0%)                         | 0 / 0 (0%)                      | 0 / 0 (0%)                      | 0 / 0 (0%)                       | 0 / 1 (0%)                       |
| <i>Serratia ureilytica</i>         | 1 / 1 (100%)                       | 0 / 0 (0%)                      | 1 / 1 (100%)                    | 0 / 0 (0%)                       | 0 / 0 (0%)                       |

**Table S6.** Dynamics of the rate of ESBL-positive isolates depending on source of infection throughout the study period.

| Year                               | Total               | IAI               | UTI                | SSTI              | LRTI               |
|------------------------------------|---------------------|-------------------|--------------------|-------------------|--------------------|
| <b><i>All Enterobacterales</i></b> |                     |                   |                    |                   |                    |
| 2012                               | 200 / 394 (50.8%)   | 11 / 17 (64.7%)   | 56 / 167 (33.5%)   | 54 / 98 (55.1%)   | 79 / 112 (70.5%)   |
| 2013                               | 372 / 712 (52.2%)   | 42 / 84 (50%)     | 90 / 198 (45.5%)   | 87 / 198 (43.9%)  | 153 / 232 (65.9%)  |
| 2014                               | 443 / 812 (54.6%)   | 66 / 154 (42.9%)  | 118 / 262 (45%)    | 78 / 137 (56.9%)  | 181 / 259 (69.9%)  |
| 2015                               | 134 / 383 (35%)     | 4 / 17 (23.5%)    | 36 / 133 (27.1%)   | 35 / 105 (33.3%)  | 59 / 128 (46.1%)   |
| 2016                               | 198 / 478 (41.4%)   | 20 / 89 (22.5%)   | 44 / 100 (44%)     | 61 / 131 (46.6%)  | 73 / 158 (46.2%)   |
| 2017                               | 197 / 470 (41.9%)   | 28 / 91 (30.8%)   | 27 / 83 (32.5%)    | 56 / 123 (45.5%)  | 86 / 173 (49.7%)   |
| 2018                               | 240 / 562 (42.7%)   | 49 / 162 (30.2%)  | 49 / 126 (38.9%)   | 35 / 102 (34.3%)  | 107 / 172 (62.2%)  |
| Total                              | 1784 / 3811 (46.8%) | 220 / 614 (35.8%) | 420 / 1069 (39.3%) | 406 / 894 (45.4%) | 738 / 1234 (59.8%) |
| <b><i>E. coli</i></b>              |                     |                   |                    |                   |                    |
| 2012                               | 46 / 123 (37.4%)    | 3 / 7 (42.9%)     | 17 / 72 (23.6%)    | 14 / 23 (60.9%)   | 12 / 21 (57.1%)    |
| 2013                               | 109 / 253 (43.1%)   | 20 / 47 (42.6%)   | 35 / 102 (34.3%)   | 35 / 69 (50.7%)   | 19 / 35 (54.3%)    |
| 2014                               | 122 / 304 (40.1%)   | 32 / 79 (40.5%)   | 45 / 136 (33.1%)   | 23 / 50 (46%)     | 22 / 39 (56.4%)    |
| 2015                               | 45 / 145 (31%)      | 3 / 8 (37.5%)     | 18 / 68 (26.5%)    | 14 / 43 (32.6%)   | 10 / 26 (38.5%)    |
| 2016                               | 61 / 165 (37%)      | 4 / 29 (13.8%)    | 20 / 45 (44.4%)    | 23 / 55 (41.8%)   | 14 / 36 (38.9%)    |
| 2017                               | 68 / 161 (42.2%)    | 12 / 33 (36.4%)   | 13 / 33 (39.4%)    | 25 / 55 (45.5%)   | 18 / 40 (45%)      |
| 2018                               | 78 / 163 (47.9%)    | 33 / 62 (53.2%)   | 19 / 46 (41.3%)    | 13 / 34 (38.2%)   | 13 / 21 (61.9%)    |
| Total                              | 529 / 1314 (40.3%)  | 107 / 265 (40.4%) | 167 / 502 (33.3%)  | 147 / 329 (44.7%) | 108 / 218 (49.5%)  |
| <b><i>K. pneumoniae</i></b>        |                     |                   |                    |                   |                    |
| 2012                               | 97 / 129 (75.2%)    | 3 / 3 (100%)      | 20 / 33 (60.6%)    | 23 / 33 (69.7%)   | 51 / 60 (85%)      |
| 2013                               | 191 / 232 (82.3%)   | 17 / 24 (70.8%)   | 31 / 42 (73.8%)    | 35 / 47 (74.5%)   | 108 / 119 (90.8%)  |
| 2014                               | 242 / 309 (78.3%)   | 24 / 37 (64.9%)   | 50 / 75 (66.7%)    | 44 / 52 (84.6%)   | 124 / 145 (85.5%)  |
| 2015                               | 57 / 108 (52.8%)    | 1 / 3 (33.3%)     | 13 / 32 (40.6%)    | 13 / 23 (56.5%)   | 30 / 50 (60%)      |
| 2016                               | 88 / 135 (65.2%)    | 12 / 27 (44.4%)   | 16 / 21 (76.2%)    | 16 / 20 (80%)     | 44 / 67 (65.7%)    |
| 2017                               | 111 / 145 (76.6%)   | 15 / 21 (71.4%)   | 9 / 13 (69.2%)     | 26 / 30 (86.7%)   | 61 / 81 (75.3%)    |
| 2018                               | 149 / 188 (79.3%)   | 13 / 29 (44.8%)   | 24 / 29 (82.8%)    | 20 / 24 (83.3%)   | 92 / 106 (86.8%)   |
| Total                              | 935 / 1246 (75%)    | 85 / 144 (59%)    | 163 / 245 (66.5%)  | 177 / 229 (77.3%) | 510 / 628 (81.2%)  |
